# Supplementary material
Source: publisher site journal article supplement (https://www.dovepress.com/article/386838)
Supplement: Supplementary file 1 [file get_supplementary_file.php]

| **Supplemental Table 1** Sleep Valuation Item Bank | | | | | | | | |  | |  | |
| --- | --- | --- | --- | --- | --- | --- | --- | --- | --- | --- | --- | --- |
| **#** | **Item** | **Mean** | **SD** | **Skewness** | **Kurtosis** | ***α*** | **Test-retest reliability** | **Item-total correlation** | | **Essential rating** | |  | |
| 1 | I generally desire more sleep | 69.03 | 24.74 | -0.73 | 2.96 | 0.92 | 0.64 | 0.51 | | 1.56 | |  | |
| 2 | When I have nothing to do, I would prefer to sleep | 48.48 | 28.98 | 0.07 | 2.02 | 0.92 | 0.67 | 0.65 | | 1.00 | |  | |
| 3b | I put off going to sleep at night, even when I am sleepy | 45.96 | 30.56 | 0.07 | 1.79 | 0.92 | 0.61 | 0.08 | | 1.56 | |  | |
| 4 | I generally prefer to sleep in | 61.87 | 27.97 | -0.48 | 2.28 | 0.92 | 0.70 | 0.55 | | 1.22 | |  | |
| 5 | When I wake up in the morning or my alarm goes off, I generally try to go back to sleep | 46.22 | 31.19 | 0.08 | 1.74 | 0.92 | 0.74 | 0.47 | | 1.44 | |  | |
| 6 | If I had to choose between sleeping in a little longer or eating breakfast, I would choose to sleep in | 57.63 | 32.41 | -0.34 | 1.83 | 0.92 | 0.77 | 0.52 | | 1.67 | |  | |
| 7 | I try to sleep as much as I can | 61.44 | 27.18 | -0.47 | 2.42 | 0.92 | 0.62 | 0.65 | | 1.62 | |  | |
| 8 | I take every opportunity I can to sleep | 47.84 | 29.11 | 0.04 | 1.97 | 0.92 | 0.69 | 0.68 | | 1.50 | |  | |
| 9 | I would rather stay asleep than wake up | 45.80 | 31.14 | 0.13 | 1.80 | 0.92 | 0.68 | 0.67 | | 1.38 | |  | |
| 10 | I would rather get in bed to sleep at night than stay up to do household tasks | 62.35 | 28.50 | -0.46 | 2.29 | 0.92 | 0.64 | 0.50 | | 1.67 | |  | |
| 11 | I would rather get in bed to sleep at night than stay up later to do my hobbies | 52.52 | 28.61 | -0.01 | 2.01 | 0.92 | 0.63 | 0.49 | | 1.67 | |  | |
| 12 | I would rather get in bed to sleep at night than stay up to engage in social activities | 55.18 | 29.69 | -0.10 | 1.94 | 0.92 | 0.69 | 0.53 | | 1.67 | |  | |
| 13b | I avoid doing things that might disrupt my sleep | 54.49 | 27.78 | -0.12 | 2.13 | 0.92 | 0.53 | 0.48 | | 2.00 | |  | |
| 14b | Sleep is less pleasant than being awake | 37.33 | 25.15 | 0.30 | 2.36 | 0.93 | 0.48 | -0.11 | | 1.22 | |  | |
| 15b | I want to sleep more even when I feel rested | 39.46 | 28.53 | 0.35 | 2.06 | 0.92 | 0.69 | 0.60 | | 0.89 | |  | |
| 16 | When I’m sleepy, I would rather surf the web, watch a movie, engage in social media, or play a video game than go to sleep | 41.20 | 30.14 | 0.26 | 1.87 | 0.92 | 0.70 | 0.02 | | 0.89 | |  | |
| 17a | I want to sleep because I don’t like being awake | 30.32 | 28.58 | 0.80 | 2.54 | -- | -- | -- | | 1.00 | |  | |
| 18 | I would want to sleep more if my sleep were more restful | 52.39 | 29.90 | -0.15 | 2.02 | 0.92 | 0.63 | 0.47 | | 1.00 | |  | |
| 19 | I want to sleep more because I enjoy it so much | 46.61 | 27.63 | 0.03 | 2.17 | 0.92 | 0.69 | 0.66 | | 1.33 | |  | |
| 20 | When I feel sleepy at night, I try to go to sleep | 70.31 | 23.79 | -0.74 | 2.98 | 0.93 | 0.56 | 0.28 | | 1.67 | |  | |
| 21 | When I feel sleepy at night, I push through it so I can stay awake longer | 41.02 | 28.32 | 0.21 | 1.95 | 0.92 | 0.64 | 0.03 | | 1.56 | |  | |
| 22b | I don’t mind feeling sleepy during the day | 34.42 | 27.50 | 0.61 | 2.33 | 0.92 | 0.53 | 0.10 | | 1.11 | |  | |
| 23 | I want to sleep more because I feel sleepy | 55.98 | 27.87 | -0.27 | 2.21 | 0.92 | 0.61 | 0.60 | | 1.22 | |  | |
| 24b | I would rather sleep an extra hour than work an extra hour at my current rate of pay (or if not currently employed, I would rather sleep an extra hour than work an extra hour at minimum wage) | 49.47 | 31.32 | 0.02 | 1.84 | 0.92 | 0.71 | 0.51 | | 1.78 | |  | |
| 25b | I would rather sleep an extra hour than spend an extra hour doing the things I enjoy | 38.07 | 28.62 | 0.44 | 2.16 | 0.92 | 0.63 | 0.64 | | 2.00 | |  | |
| 26 | I want to sleep even when I am not sleepy | 29.63 | 27.33 | 0.82 | 2.66 | 0.92 | 0.73 | 0.59 | | 1.11 | |  | |
| 27 | I want to sleep more because I am not getting enough restful sleep | 54.84 | 31.52 | -0.21 | 1.85 | 0.92 | 0.72 | 0.56 | | 1.56 | |  | |
| 28b | If I can’t sleep, I would rather take a sleep aid than remain awake | 42.32 | 34.28 | 0.26 | 1.64 | 0.92 | 0.76 | 0.42 | | 1.33 | |  | |
| 29 | I wish I could sleep less | 35.16 | 27.81 | 0.45 | 2.18 | 0.92 | 0.61 | 0.02 | | 1.33 | |  | |
| 30a | I dread waking up in the morning | 38.71 | 31.71 | -0.40 | 1.92 | -- | -- | -- | | 0.89 | |  | |
| 31 | I dread going to sleep at night | 28.13 | 27.58 | 0.92 | 2.82 | 0.92 | 0.67 | 0.14 | | 1.11 | |  | |
| 32a | I want to sleep my life away | 23.53 | 27.83 | -1.19 | 3.24 | -- | -- | -- | | 0.89 | |  | |
| 33 | If I could function without sleep, I would sleep less than I do | 49.21 | 31.94 | -0.02 | 1.76 | 0.93 | 0.63 | -0.02 | | 1.38 | |  | |
| 34b | I’m likely to wake up earlier than usual to do something I look forward to | 63.51 | 27.62 | -0.60 | 2.50 | 0.93 | 0.56 | -0.13 | | 1.44 | |  | |
| 35b | I look forward to going to sleep | 60.62 | 25.80 | -0.37 | 2.57 | 0.92 | 0.60 | 0.55 | | 1.67 | |  | |
| 36 | I schedule my day around my sleep | 33.84 | 28.85 | 0.56 | 2.18 | 0.92 | 0.72 | 0.53 | | 1.78 | |  | |
| 37 | I modify my daytime activities to accommodate my sleep | 34.41 | 28.73 | 0.54 | 2.17 | 0.92 | 0.75 | 0.59 | | 1.89 | |  | |
| 38 | I keep track of how much sleep I’ve lost and how much sleep I hope to make up later | 29.31 | 28.08 | 0.76 | 2.39 | 0.92 | 0.68 | 0.46 | | 1.33 | |  | |
| 39 | If I lose sleep on one night, I try to make it up by napping or sleeping more another night | 45.06 | 31.24 | 0.07 | 1.74 | 0.92 | 0.72 | 0.49 | | 1.78 | |  | |
| 40 | If I need more sleep, I am likely to sleep in even if that means I will be late | 27.22 | 27.43 | 0.85 | 2.56 | 0.92 | 0.72 | 0.48 | | 1.56 | |  | |
| 41b | I enjoy sleeping | 70.34 | 23.60 | -0.63 | 3.00 | 0.92 | 0.67 | 0.49 | | 1.22 | |  | |
| 42 | I feel that sleep is a waste of time | 26.13 | 26.33 | 0.94 | 2.85 | 0.93 | 0.68 | -0.14 | | 1.67 | |  | |
| 43 | I try to catch up on sleep on days off | 51.63 | 31.25 | -0.16 | 1.85 | 0.92 | 0.74 | 0.51 | | 1.44 | |  | |
| **Notes:** aItems removed before factor analysis for poor face validity. bItems with poor factor loading in the factor analysis. The items included in Sleep Valuation Item Bank have been previously published and are included here in accordance with the original publisher’s open access policy from Nielson SA, Taylor J, Simmons Z, Decker AN, Kay DB, Cribbet MR. Sleep valuation is associated with components of sleep health and daytime functioning in a college sample: a survey study. *Int J Environ Res Public Health*. 2021;18(11):5644. Creative Commons.19 | | | | | | | | | | | | |

| **Supplemental Table 2** Sleep Valuation | |
| --- | --- |
| 1 | How does sleep valuation relate to individual differences in specific aspects of sleep including sleep duration, sleep quality, sleep propensity, sleep depth, dreams, and sleep regularity |
| 2 | How does an individual’s sleep valuation relate to sleep-related beliefs, attitudes, and behavior? |
| 3 | How does individual sleep valuation relate to an individual's wider valuation hierarchy? |
| 4 | How does sleep valuation relate to an individual’s self-concept? |
| 5 | What factors are involved in changes in sleep valuation and how do changes in individual sleep valuation relate to changes in behavior? |
| 6 | How does the sleep valuation of an individual relate to bed partners and other family members (e.g., parent-child sleep values, sleep behavior, and sleep health). |
| 7 | How does individual sleep valuation relate to societal sleep values? |
| 8 | How does the fit between an individual’s sleep valuation and society’s sleep valuation relate to sleep health? |
| 9 | What are the major characteristics of cross-cultural stability and change in individual and supraindividual sleep valuation? |
| 10 | What is the relationship and fit between interindividual and supraindividual (family, religious affiliating, occupational culture, nationality, etc.) sleep valuation. |
| 11 | Does altering sleep valuation help prevent or treat insomnia. |
| 12 | What other types of values may be of interest to sleep medicine. For example, sleep health may be conceptualized as a terminal value that is weighed against other terminal values (such as success). |
| 13 | What is the impact of latent self-dissatisfaction with sleep have on sleep health attitudes and behavior? |
| 14 | How does sleep valuation relates to health valuation generally? |
| 15 | Which sleep values should be inculcated into society through sleep researchers, advocacy, teaching, and therapy? |
| 16 | What role do therapists have in changing patients’ sleep-related values? |
|  |  |
